# Supplementary material for: Trend tests for the evaluation of exposure-response relationships in epidemiological exposure studies
Source: Springer Nature journal article supplement (doi:10.1186/1742-5573-6-1), 2009-03-06
Supplement: Additional file 1 [file 1742-5573-6-1-s1.pdf]

## Appendix C: Additional simulation results

TABLE I Correct classification rates for several non-centrality parameters

| $\pi_j$      | ORIC( $M_0, M_1, M_2$ ) |             |       | Max( $H^1, H^2$ ) |             |       |
|--------------|-------------------------|-------------|-------|-------------------|-------------|-------|
|              | $M_0$                   | $M_1$       | $M_2$ | power             | $H^1$       | $H^2$ |
| 0.3/0.3/0.35 | .465                    | <b>.362</b> | .174  | .177              | <b>.739</b> | .261  |
| 0.3/0.3/0.4  | .179                    | <b>.686</b> | .134  | .472              | <b>.861</b> | .139  |
| 0.3/0.3/0.45 | .042                    | <b>.867</b> | .092  | .764              | <b>.918</b> | .082  |
| 0.3/0.3/0.5  | .008                    | <b>.947</b> | .045  | .940              | <b>.906</b> | .034  |
| 0.3/0.3/0.55 | .0005                   | <b>.978</b> | .022  | .992              | <b>.986</b> | .014  |
| 0.3/0.3/0.6  | .000                    | <b>.991</b> | .009  | .999              | <b>.998</b> | .002  |

(bold indicate correct classification)

**TABLE II** Correct classification rates for several sample sizes  $n_j$

| $\pi_j$     | $n_j$ | True   | ORIC( $M_0, M_1, M_2$ ) |             |             | Max( $H^1, H^2$ ) |             |             |
|-------------|-------|--------|-------------------------|-------------|-------------|-------------------|-------------|-------------|
|             |       | Change | $M_0$                   | $M_1$       | $M_2$       | Power             | $H^1$       | $H^2$       |
| 0.3/0.3/0.5 | 150   | 1      | .0010                   | <b>.975</b> | .025        | .991              | <b>.983</b> | .017        |
| 0.3/0.5/0.5 | 150   | 2      | .0005                   | .021        | <b>.979</b> | .984              | .020        | <b>.980</b> |
| 0.3/0.3/0.5 | 125   | 1      | .001                    | <b>.972</b> | .028        | .975              | <b>.954</b> | .021        |
| 0.3/0.5/0.5 | 125   | 2      | .002                    | .026        | <b>.972</b> | .968              | .028        | <b>.939</b> |
| 0.3/0.3/0.5 | 100   | 1      | .006                    | <b>.940</b> | .054        | .940              | <b>.906</b> | .034        |
| 0.3/0.5/0.5 | 100   | 2      | .004                    | .053        | <b>.943</b> | .926              | .044        | <b>.882</b> |
| 0.3/0.3/0.5 | 75    | 1      | .024                    | <b>.908</b> | .069        | .869              | <b>.824</b> | .044        |
| 0.3/0.5/0.5 | 75    | 2      | .025                    | .072        | <b>.903</b> | .852              | .048        | <b>.804</b> |
| 0.3/0.3/0.5 | 50    | 1      | .067                    | <b>.828</b> | .105        | .699              | <b>.645</b> | .054        |
| 0.3/0.5/0.5 | 50    | 2      | .064                    | .100        | <b>.837</b> | .683              | .061        | <b>.622</b> |
| 0.3/0.3/0.5 | 25    | 1      | .196                    | <b>.644</b> | .160        | .450              | .384        | .065        |
| 0.3/0.5/0.5 | 25    | 2      | .199                    | .153        | <b>.649</b> | .427              | .073        | .354        |

*(bold indicate correct classification)*

In practice the change point definition is relative to the pattern of proportions. In Table II the switch from  $q = 3$  to  $q = 2$  reveals a monotonic increase of the estimation of the alternative  $H^2$ . This increase is weaker for the switch from  $q=3$  to  $q=1$  according to the asymmetrical effect described in Table I.

**TABLE III** Correct classification rates for switching the change point

| Alternative     | Switch | Power | H <sup>1</sup> | H <sup>2</sup> | H <sup>3</sup> |
|-----------------|--------|-------|----------------|----------------|----------------|
| .01/.01/.01/.07 | q=4→3  | .862  | .000           | .021           | <b>.979</b>    |
| .01/.01/.02/.07 |        | .809  | .001           | .114           | .885           |
| .01/.01/.03/.07 |        | .809  | .001           | .268           | .731           |
| .01/.01/.04/.07 |        | .820  | .005           | .454           | .541           |
| .01/.01/.05/.07 |        | .851  | .004           | .629           | .367           |
| .01/.01/.06/.07 |        | .885  | .002           | .770           | .229           |
| .01/.01/.07/.07 |        | .907  | .004           | <b>.843</b>    | .153           |
| .01/.01/.01/.07 | q=4→2  | .862  | .000           | .021           | <b>.979</b>    |
| .01/.02/.02/.07 |        | .727  | .009           | .074           | .917           |
| .01/.03/.03/.07 |        | .639  | .084           | .156           | .761           |
| .01/.04/.04/.07 |        | .603  | .222           | .188           | .590           |
| .01/.05/.05/.07 |        | .599  | .422           | .241           | .337           |
| .01/.06/.06/.07 |        | .662  | .610           | .196           | .193           |
| .01/.07/.07/.07 |        | .728  | <b>.764</b>    | .147           | .089           |

( $n_j=100$ ; bold indicate correct classification)
